# Supplementary material for: Nano/Micro-Structured ZnO Rods Synthesized by Thermal Chemical Vapor Deposition with Perpendicular Configuration
Source: MDPI journal article supplement (doi:10.3390/nano11102518), 2021-09-27
Supplement: s1 [file s1]

# Nano/Micro-Structured ZnO Rods Synthesized by Thermal Chemical Vapor Deposition with Perpendicular Configuration

Seok Cheol Choi <sup>1</sup>, Do Kyung Lee <sup>2,\*</sup> and Sang Ho Sohn <sup>3,\*</sup>

<sup>1</sup> Department of Process Development, LG Electronics, Gumi 39368, Korea; jomi119@hanmail.net

<sup>2</sup> School of Advanced Materials Science and Chemical Engineering, Daegu Catholic University, Gyeongsan 38430, Korea

<sup>3</sup> Department of Physics, Kyungpook National University, Daegu 41566, Korea

\* Correspondence: dokyung@cu.ac.kr (D.K.L.); shsohn@knu.ac.kr (S.H.S.)

For the synthesis of nano/micro-structured ZnO rods, thermal chemical-vapor deposition (CVD) system with perpendicular setup was used, seen in Figure S1. The experimental setup was vertically positioned by reversely loading the ZnO-seeded Si substrate at the top of an alumina holder. The distance between the substrate and ZnO+C precursor was fixed at about 4 mm.

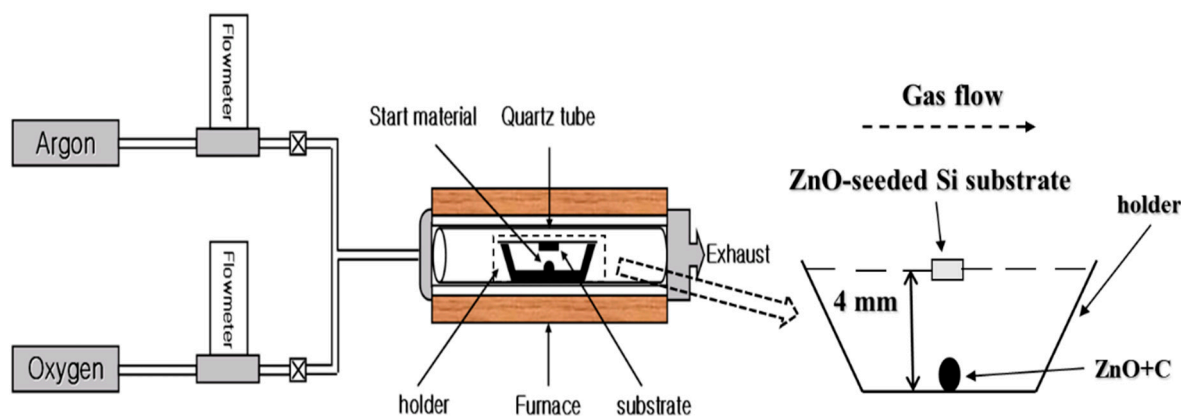

**Figure S1.** Schematic of thermal CVD with perpendicular setup.

Figure S2 shows the water contact angle on the surface of ZnO-seeded Si substrate. The contact angle of ZnO-seeded Si substrate surface was measured using the contact angle measurement equipment (KRUSS, DSA100, Hamburg, Germany) at room temperature. Surface energy of ZnO-seeded Si substrate was calculated by using the Neumann method [S1]. As shown in Figure S2, the contact angle of ZnO-seeded Si substrate surface was 92 ° and the corresponding surface energy was 20.9 dyne/cm, indicating a slight hydrophobic surface. These are similar to that reported by Davea et.al. [S2].

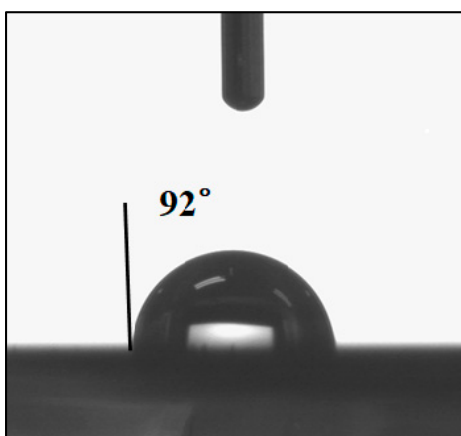

**Figure S2.** Water contact angle on the surface of ZnO-seeded Si substrate.

### References

- [S1] Kwok, D.Y.; Lam, C.N.C.; Li, A.; Zhu, K.; Wu, R.; Neumann, A.W.; Low-rate dynamic contact angles on polystyrene and the determination of solid surface tensions, *Polym. Eng. Sci.* **1998**, 38, 1675–1684.
- [S2] Davea, P. Y.; Patela, K. H.; Chauhana, K. V.; Chawlab, A. K.; Rawala, S. K.; Examination of zinc oxide films prepared by magnetron sputtering, *Procedia Technology* **2016**, 23, 328–335.
